**S1 Fig. Baseline characteristics (age, sex, EDSS, number of relapse prior to treatment and brain T2 lesion load) in the original sample of NTZ and RTX treated RRMS patients and after matching by propensity scores.**

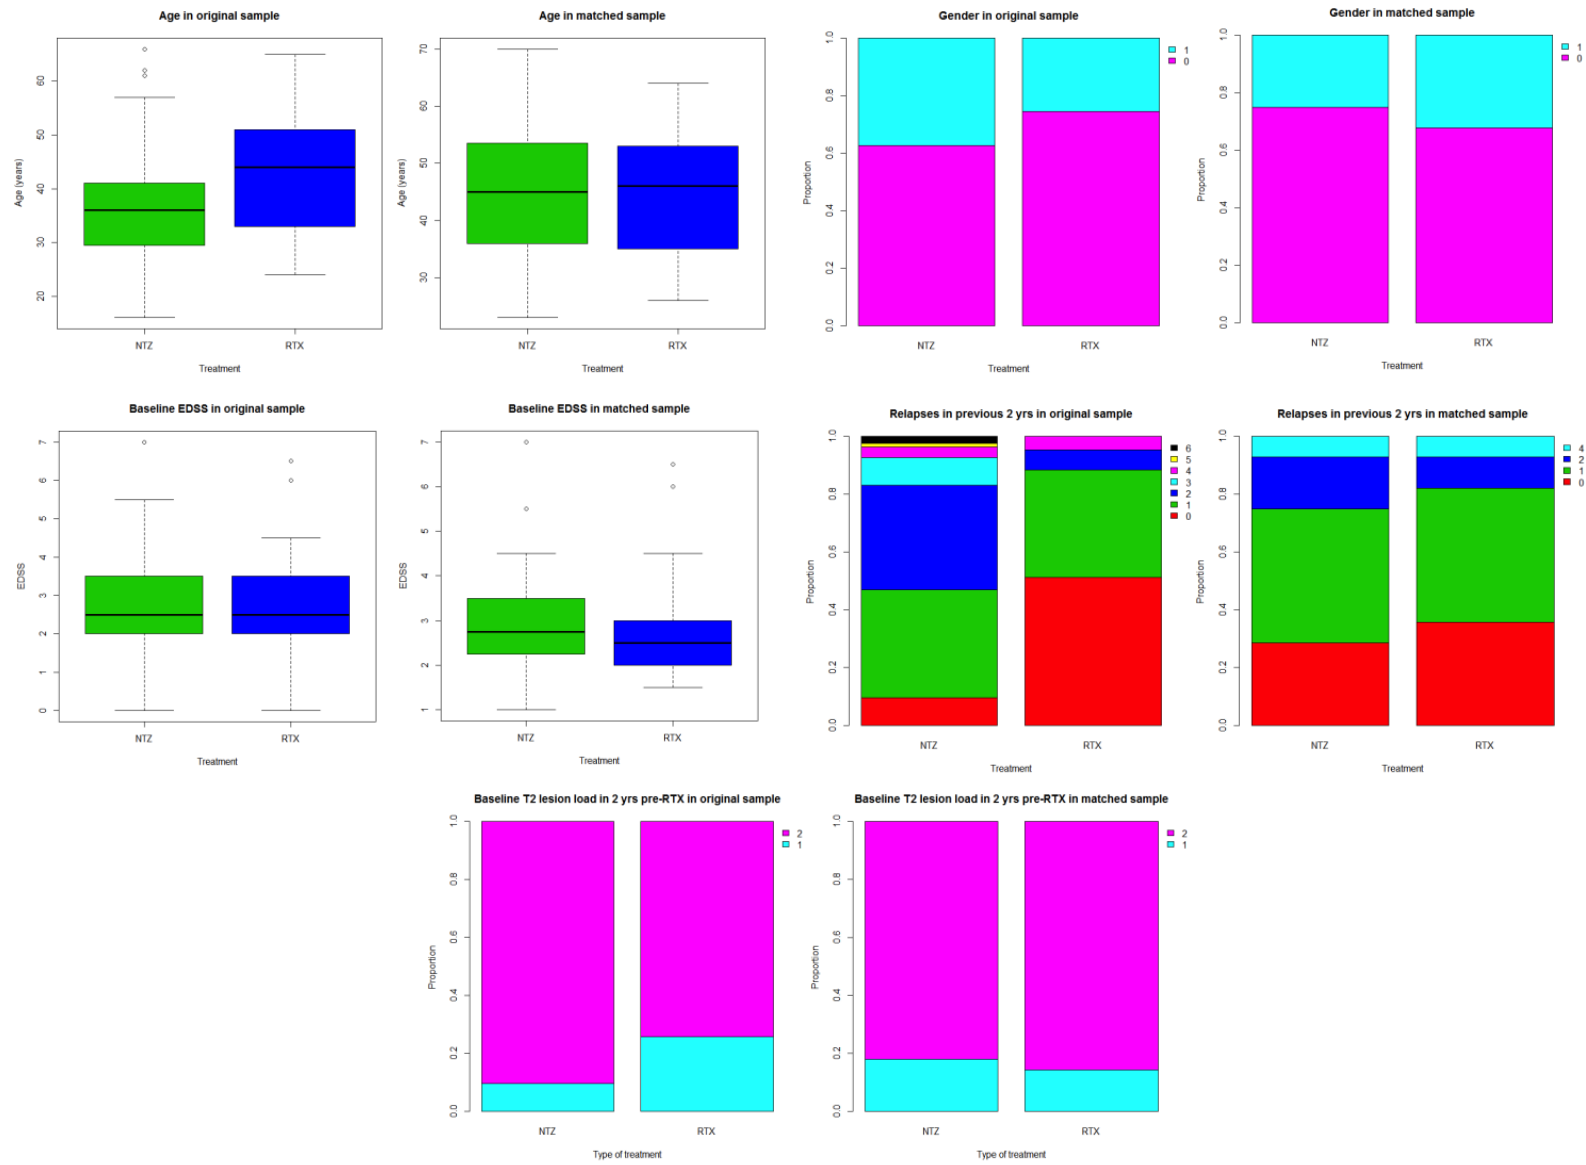

Source: https://storage.googleapis.com/plos-corpus-prod/10.1371/journal.pone.0197415/1/pone.0197415.s002.pdf
