# Supplementary material for: Effectiveness and safety of Rituximab in multiple sclerosis: an observational study from Southern Switzerland
Source: PubMed Central journal article supplement (PMC5951582; doi:10.1371/journal.pone.0197415), 2018-05-14
Supplement: pone.0197415.s001.pdf [file pone.0197415.s001.pdf]

**S1 Table. Baseline characteristics at first NTZ infusion in the 83 MS patients included in the study.**

**Continuous and ordinal variables are described by median (IQR), categorical variables by counts and percentage.**

| <b>Variables</b>                        |                    | <b>Median (IQR) /count (%)</b> |
|-----------------------------------------|--------------------|--------------------------------|
| <b>Age</b>                              |                    | 36 (30-41)                     |
| <b>Sex</b>                              | M                  | 31 (37.3)                      |
|                                         | F                  | 52 (62.7)                      |
| <b>EDSS</b>                             |                    | 2.5 (2.0-3.5)                  |
| <b>Number of relapses 2 yrs pre-NTZ</b> | 0                  | 8 (9.6)                        |
|                                         | 1                  | 31 (37.3)                      |
|                                         | 2                  | 30 (36.2)                      |
|                                         | 3                  | 8 (9.7)                        |
|                                         | 4                  | 3 (3.6)                        |
|                                         | 5                  | 1 (1.2)                        |
|                                         | 6                  | 2 (2.4)                        |
| <b>Brain T2 lesions</b>                 | 0-1                | 0 (0)                          |
|                                         | 1-9                | 8 (9.6)                        |
|                                         | >9                 | 75 (90.4)                      |
| <b>Brain GE lesions</b>                 | No                 | 60 (72.3)                      |
|                                         | Yes                | 23 (27.7.0)                    |
| <b>Number of DMTs before NTZ</b>        | 0                  | 15 (18.1)                      |
|                                         | 1                  | 47 (56.6)                      |
|                                         | 2                  | 12 (14.5)                      |
|                                         | 3                  | 4 (4.8)                        |
|                                         | 4                  | 2 (2.4)                        |
|                                         | 5                  | 3 (3.6)                        |
| <b>Last treatment before NTZ</b>        | Interferon         | 52 (62.6)                      |
|                                         | Glatiramer acetate | 13 (15.7)                      |
|                                         | None               | 14 (16.9)                      |
|                                         | Other              | 4 (4.8)                        |
